# Supplementary material for: Synthesis, spectral characterization, structural studies, molecular docking and antimicrobial evaluation of new dioxidouranium(vi) complexes incorporating tetradentate N2O2Schiff base ligands
Source: Royal Society of Chemistry journal article supplement (doi:10.1039/c5ra17524k), 2015-01-01
Supplement: c5ra17524k1.pdf [file c5ra17524k1.pdf]

**Synthesis, spectral characterization, structure studies, molecular docking and antimicrobial evaluation of new dioxidouranium(VI) complexes incorporating tetradentate  $N_2O_2$  Schiff base ligands**

S. Yousef Ebrahimipour\*, Iran Sheikhshoae, Jesús Castro, Michal Dušek, Zeinab Tohidian,

Václav Eigner, Moj Khaleghi

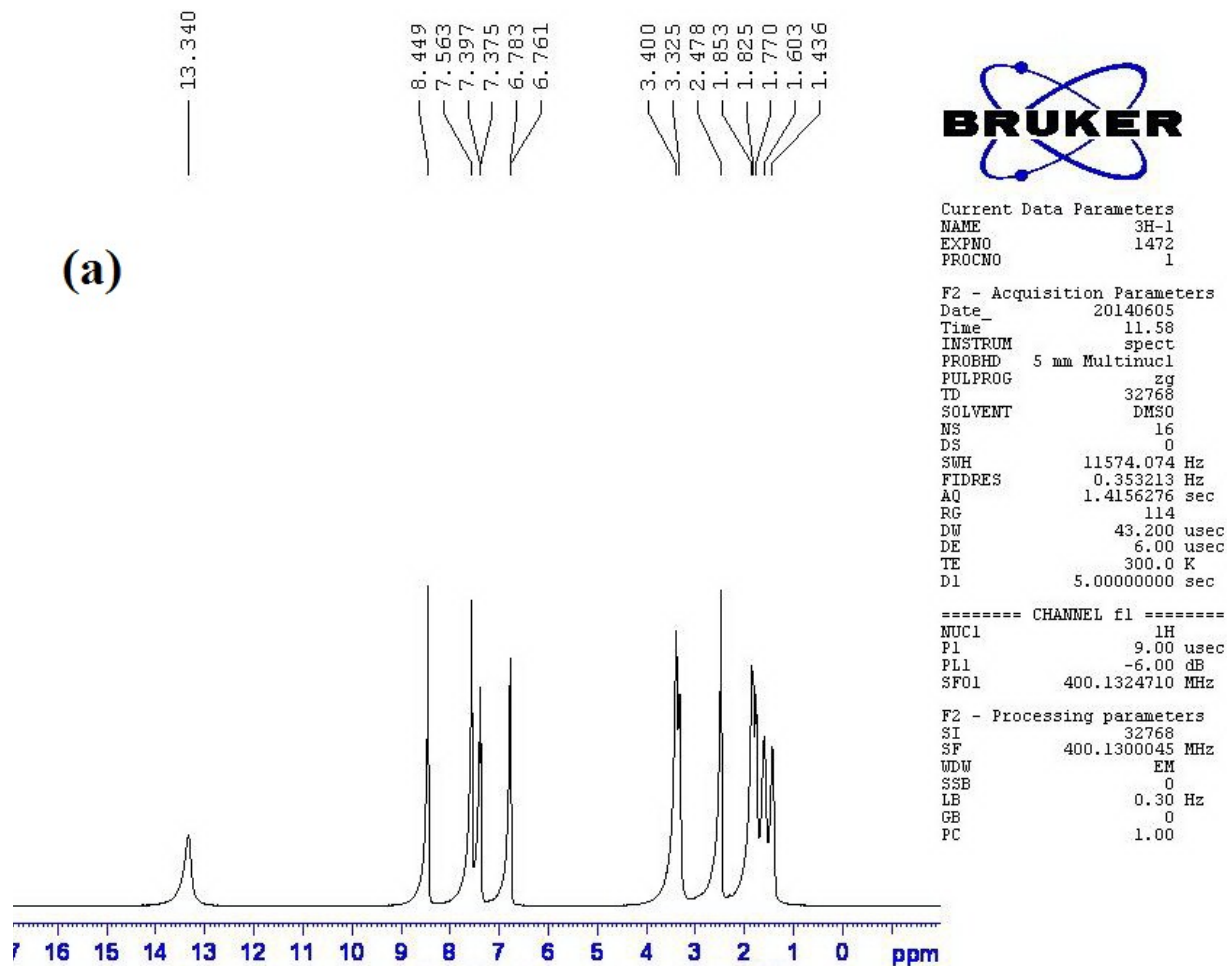

Fig. S1.  $^1\text{H}$  NMR spectrum of  $\text{H}_2\text{L}^1$

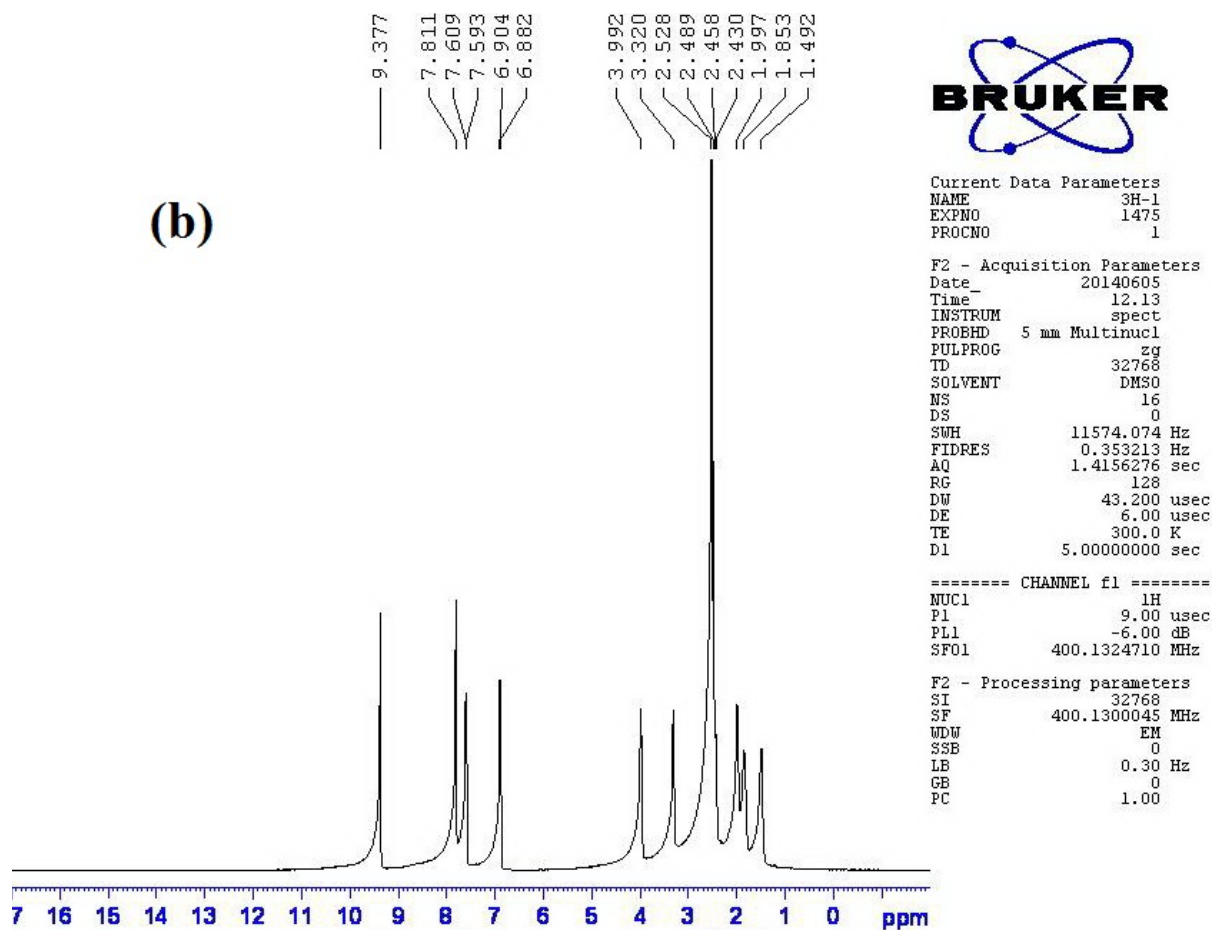

Fig. S2. <sup>1</sup>H NMR spectrum of [UO<sub>2</sub>(L<sup>1</sup>)(DMSO)].

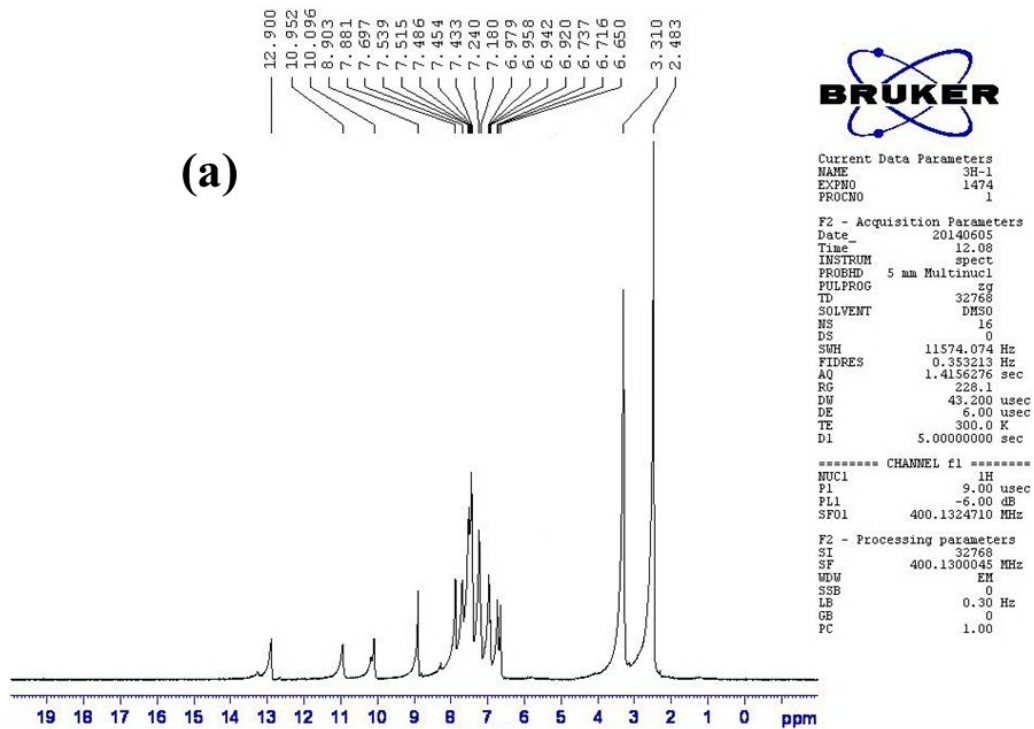

Fig. S3.  $^1\text{H}$  NMR spectrum of  $\text{H}_2\text{L}^2$

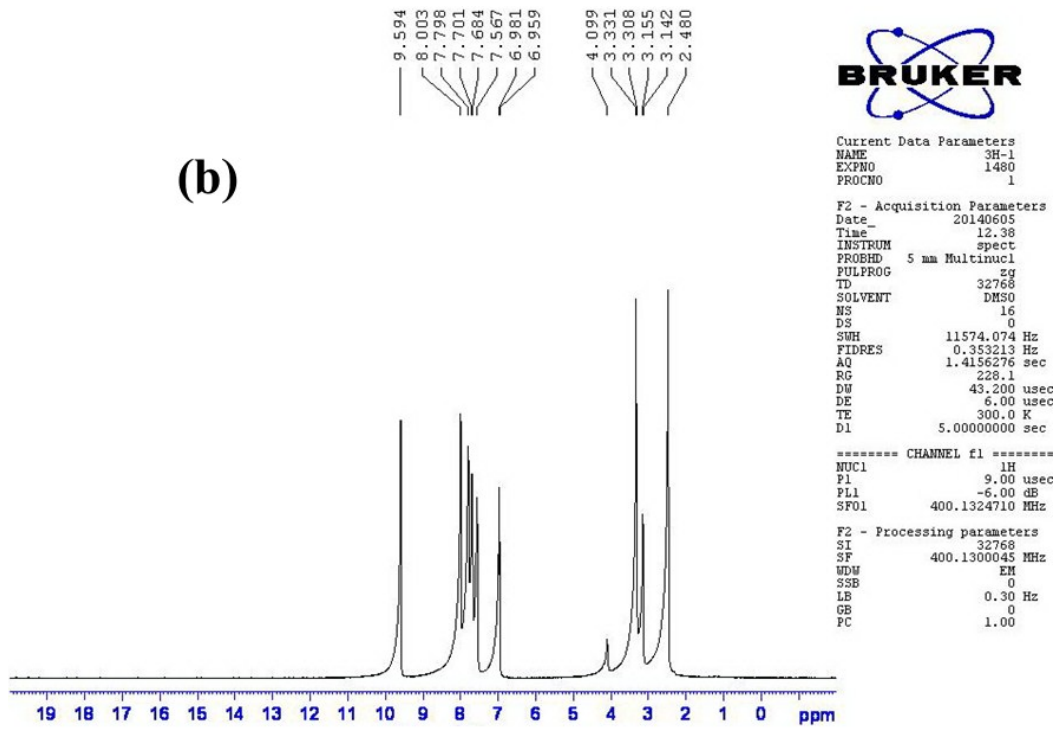

Fig. S4.  $^1\text{H}$  NMR spectrum  $[\text{UO}_2(\text{L}^2)(\text{MeOH})]$ .

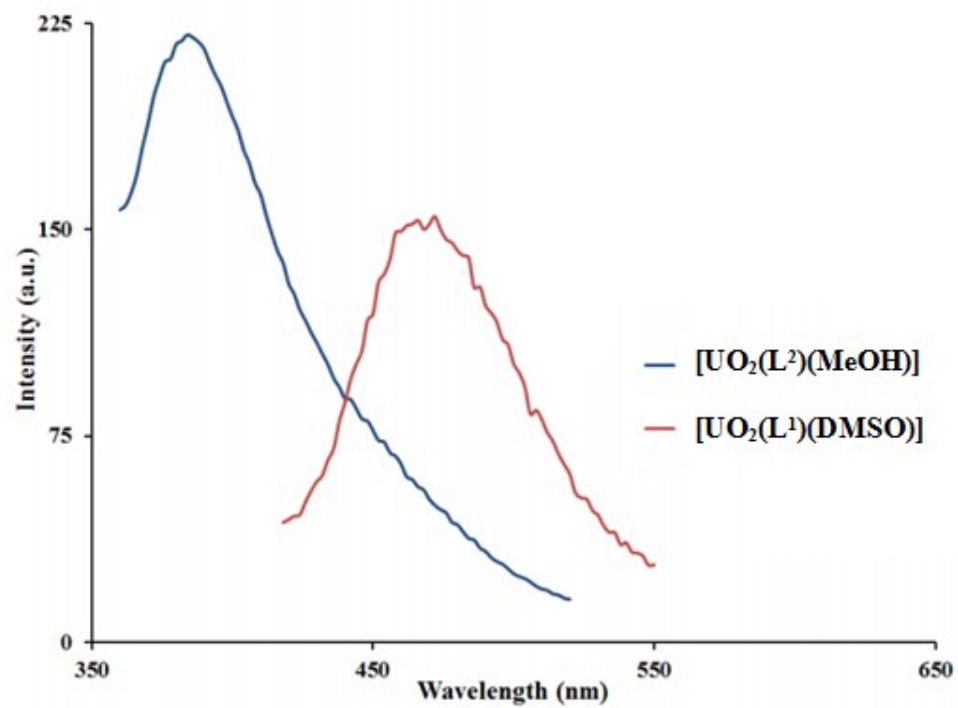

**Fig. S5.** Fluorescent spectra of complexes 1 and 2.

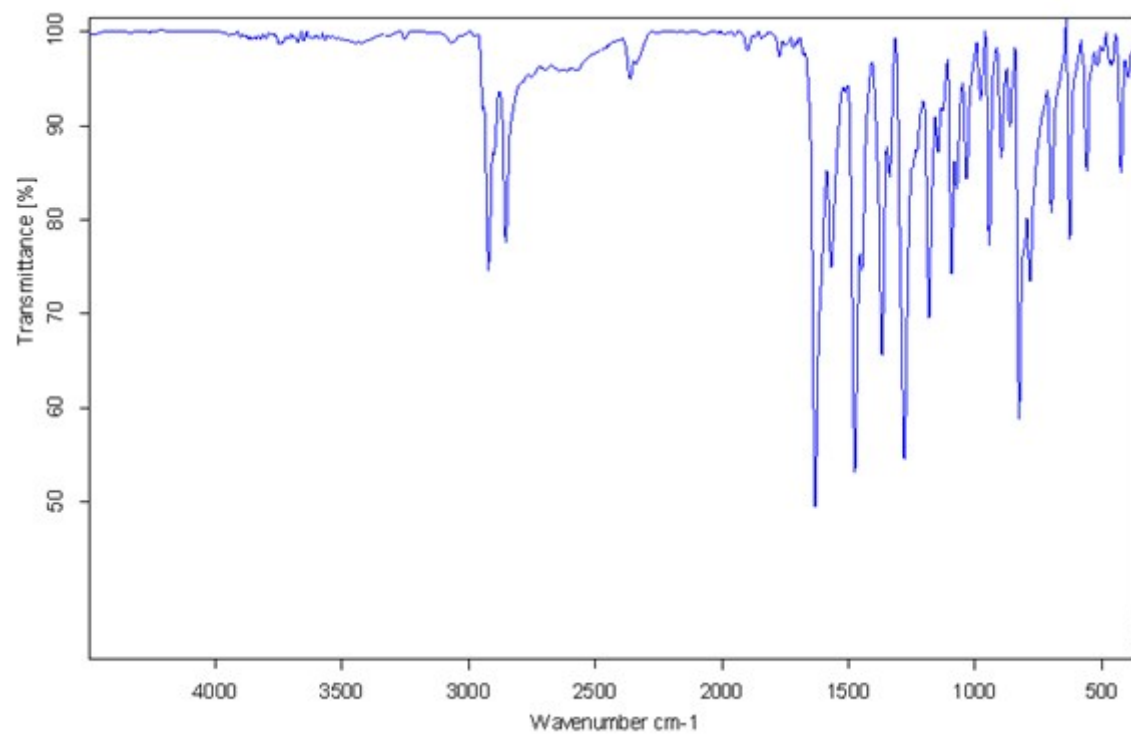

**Fig. S6.** FTIR spectrum of H<sub>2</sub>L<sup>1</sup>

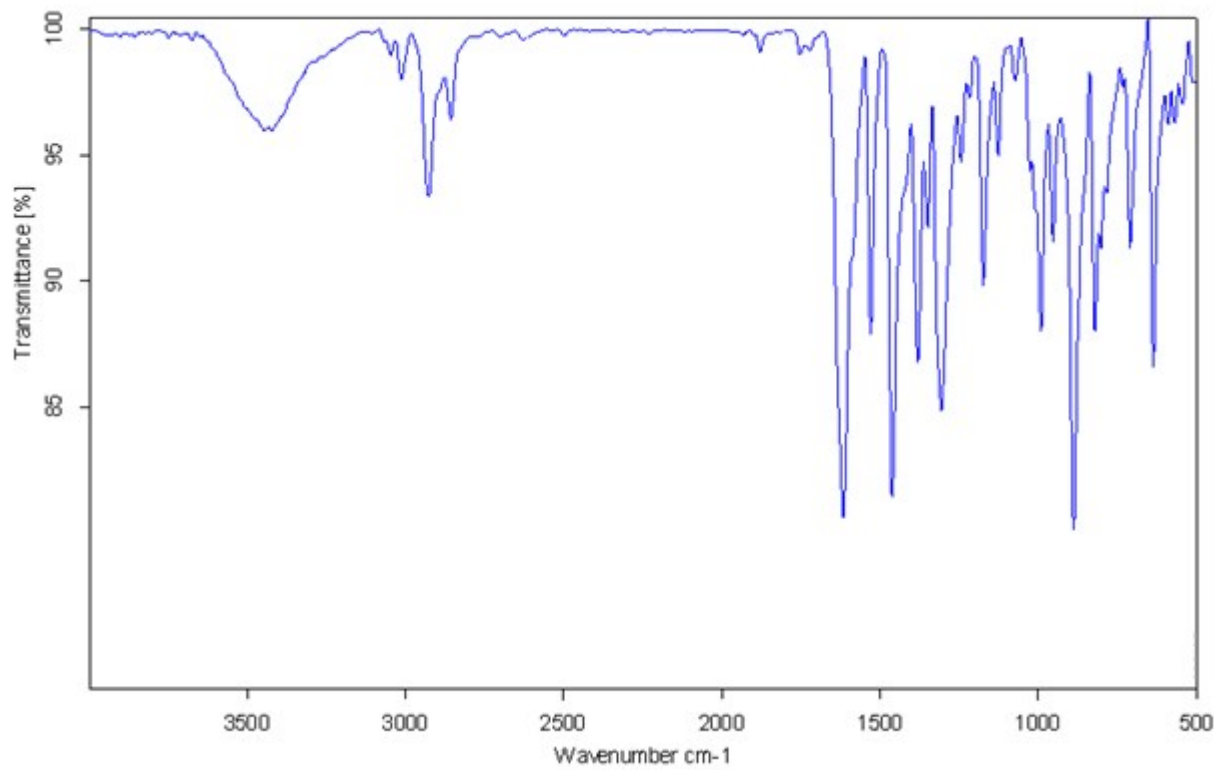

**Fig. S7.** FTIR spectrum of [UO<sub>2</sub>(L<sup>1</sup>)(DMSO)].



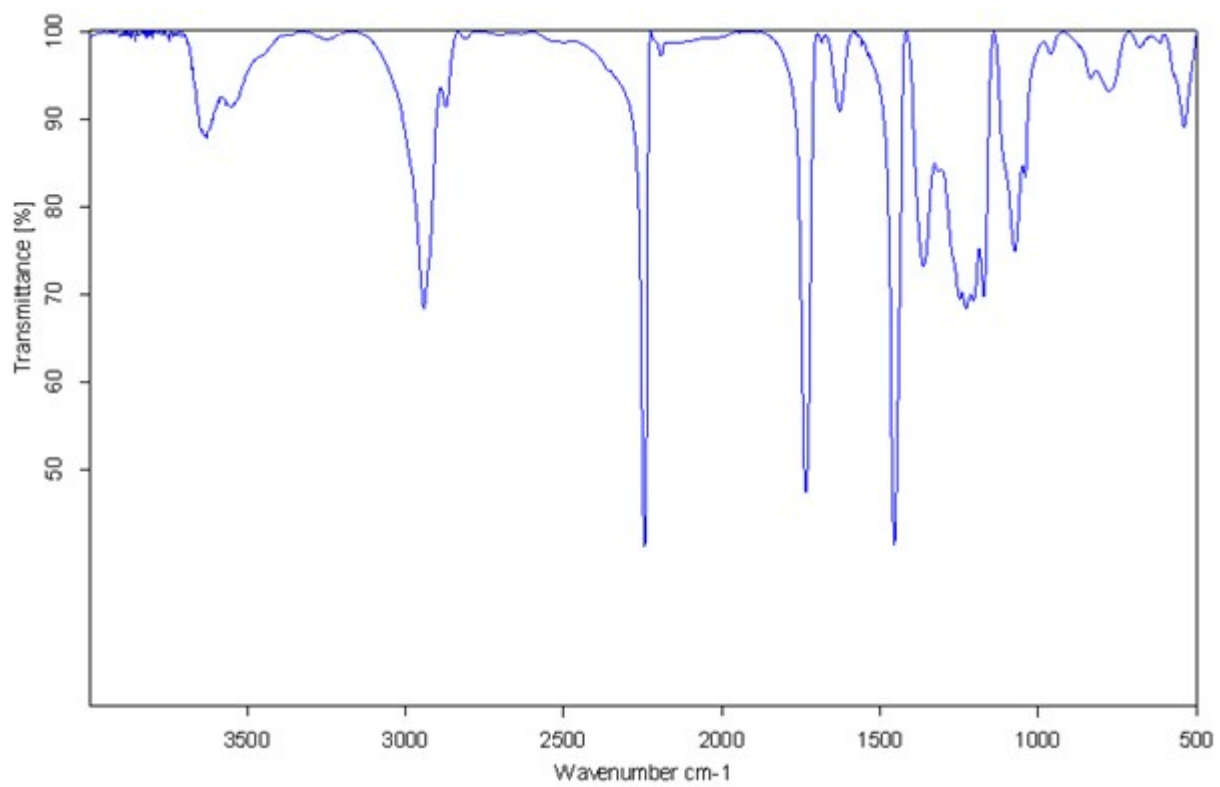

**Fig. S8.** FTIR spectrum of H<sub>2</sub>L<sup>2</sup>

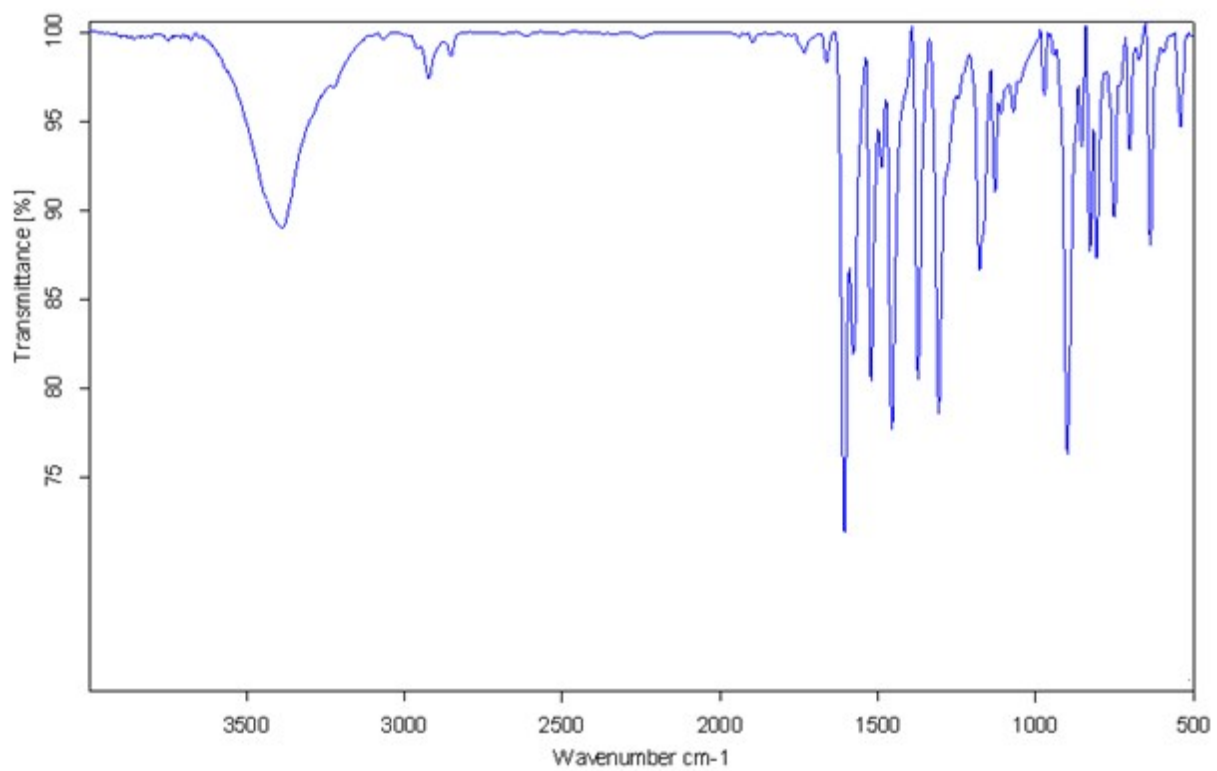

**Fig. S9.** FTIR spectrum of [UO<sub>2</sub>(L<sup>2</sup>)(MeOH)].
